# Supplementary material
Source: PubMed Central journal article supplement (PMC2206602)

(1) non-expression of intronic ncRNA despite high expression of host protein-coding gene

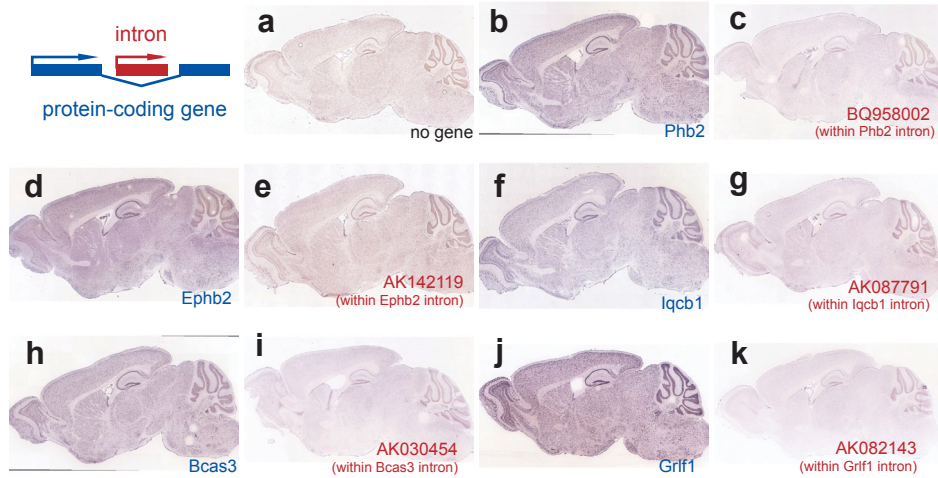

(2) cytoplasmic expression of intronic ncRNAs

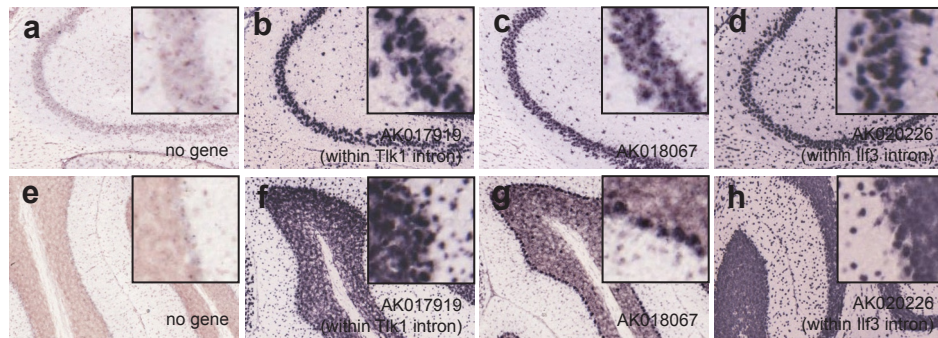

(3) concordant and discordant expression of intronic ncRNA compared to host protein-coding gene

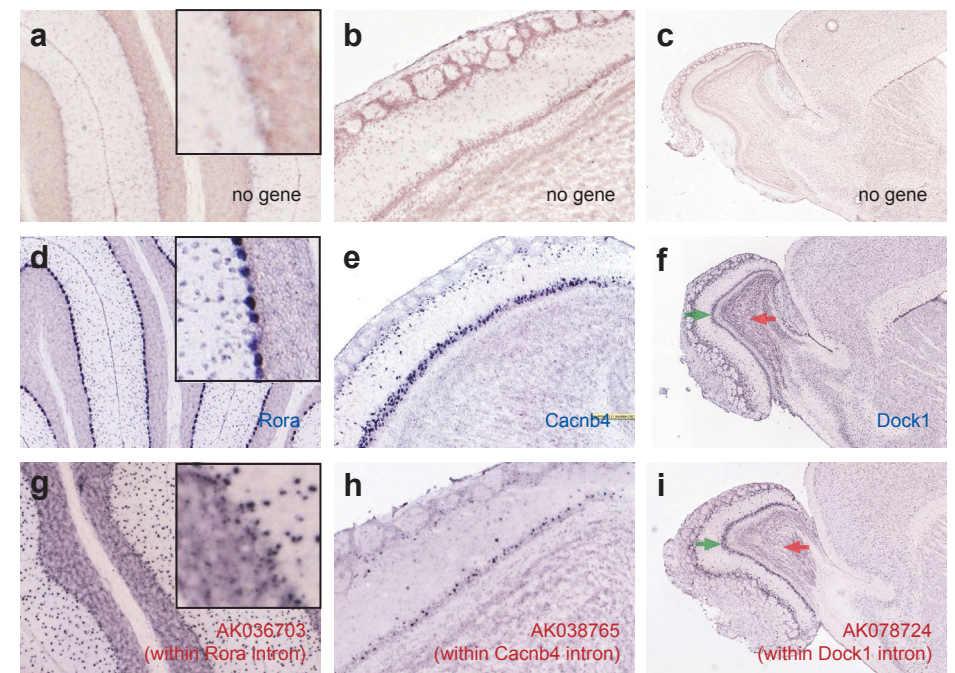

Supplement: pnas_0706729105_13.pdf [file pnas_0706729105_13.pdf]
