# Supplementary material
Source: PubMed Central journal article supplement (PMC2206602)

**a**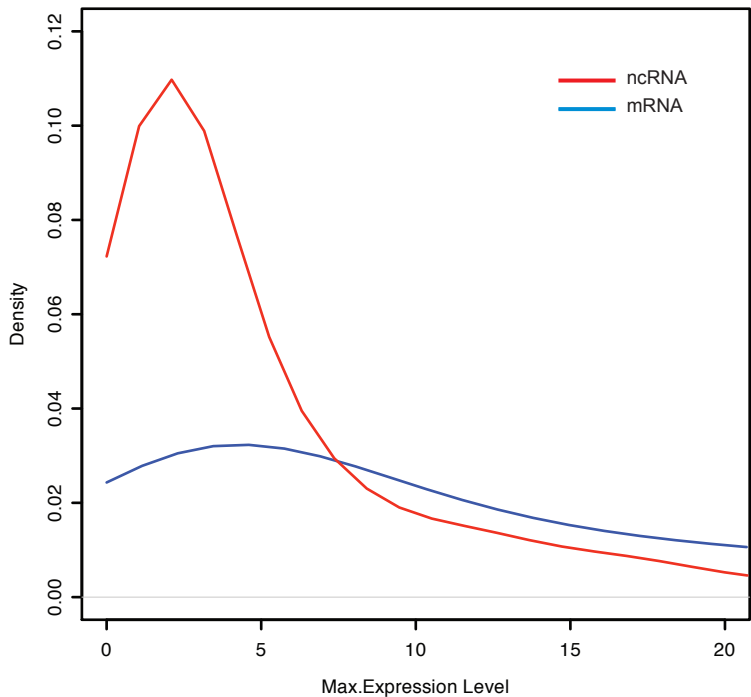**b**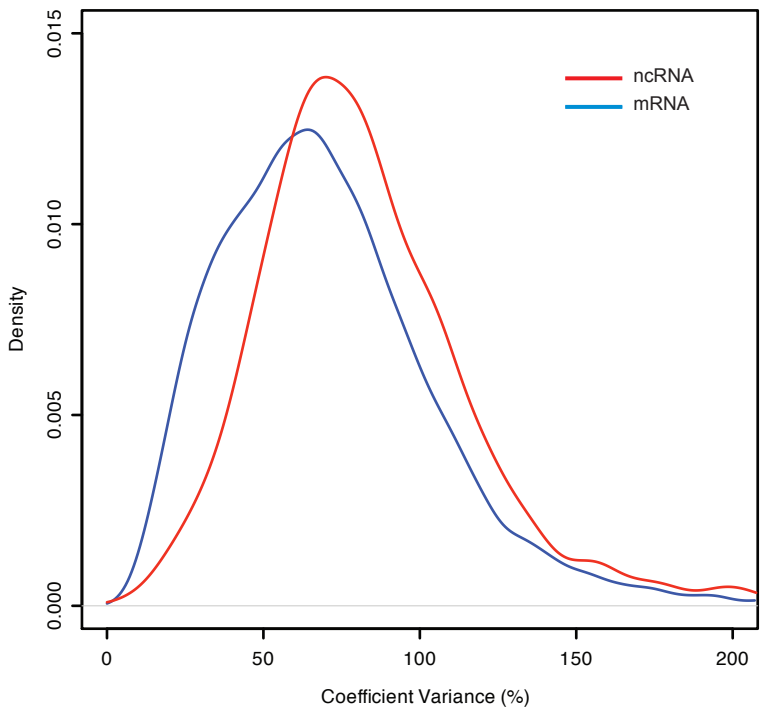

Supplement: pnas_0706729105_1.pdf [file pnas_0706729105_1.pdf]

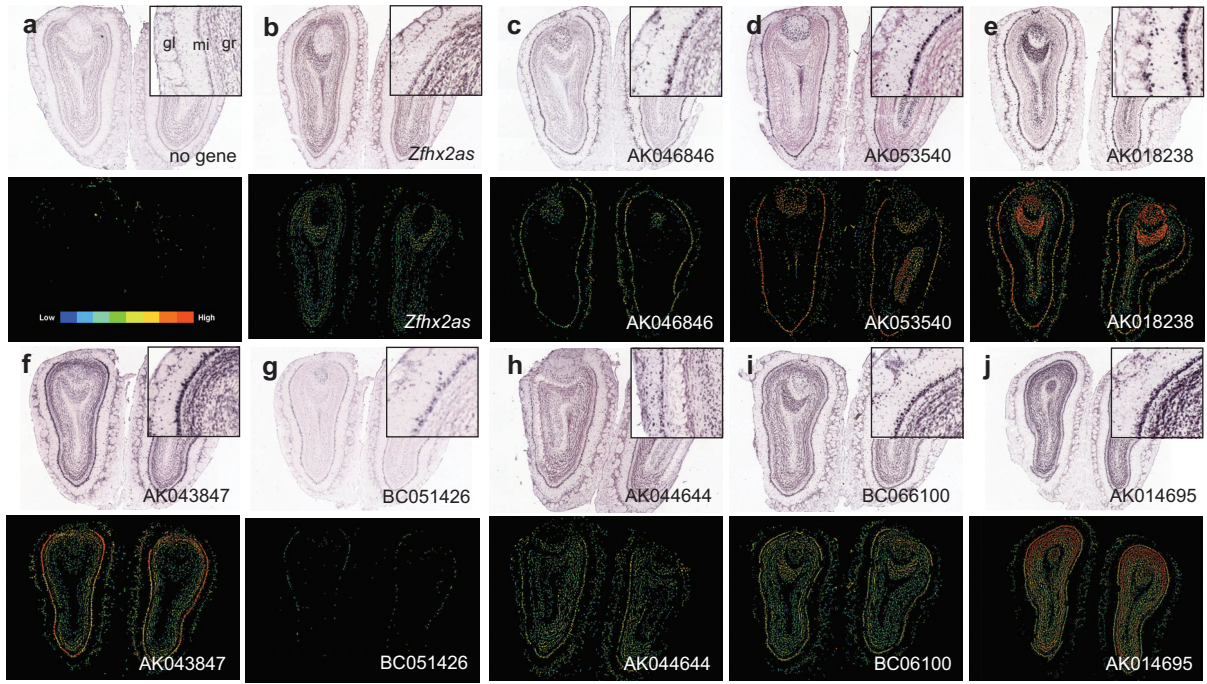

Supplement: pnas_0706729105_10.pdf [file pnas_0706729105_10.pdf]

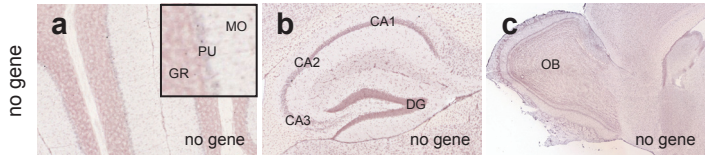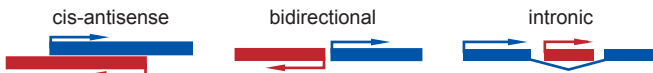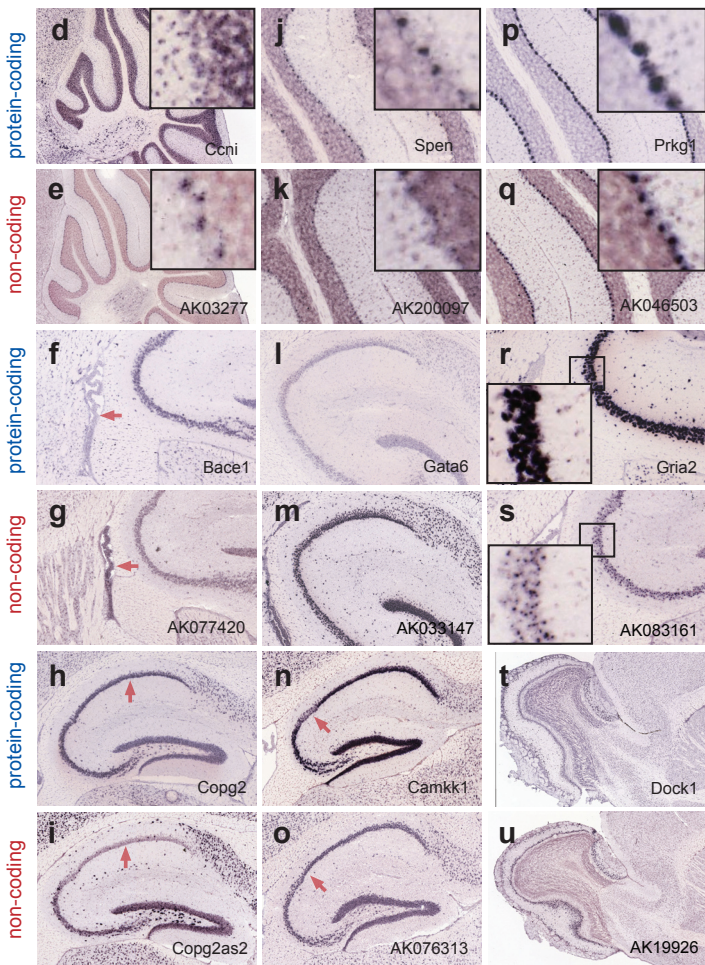

Supplement: pnas_0706729105_11.pdf [file pnas_0706729105_11.pdf]

**a** Human Mar 2006, chr18:28,603,179-28,608,782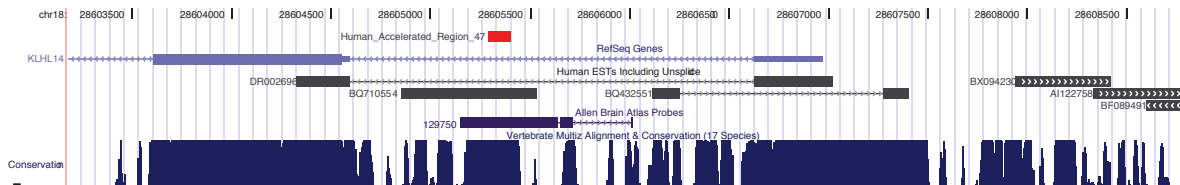**b** Mouse Feb 2006, chr18:21,794,000-21,799,488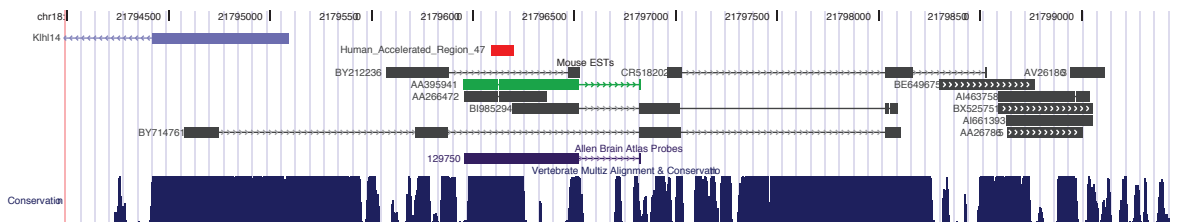**c**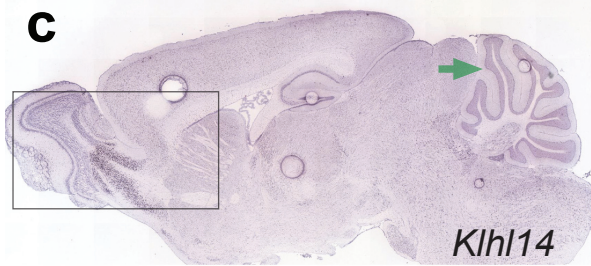**d**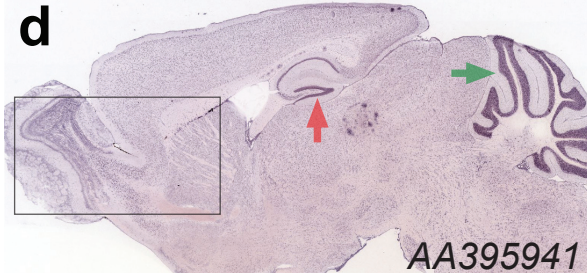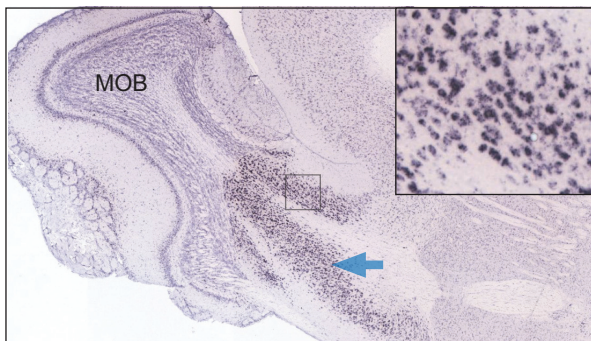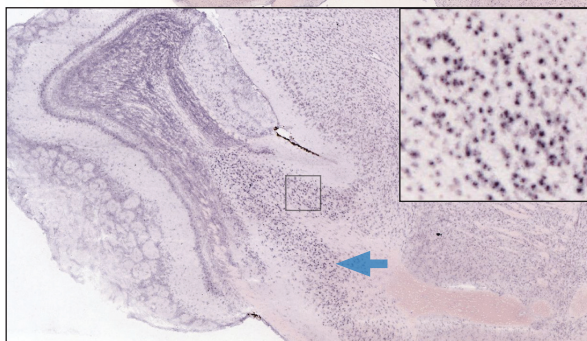

Supplement: pnas_0706729105_12.pdf [file pnas_0706729105_12.pdf]

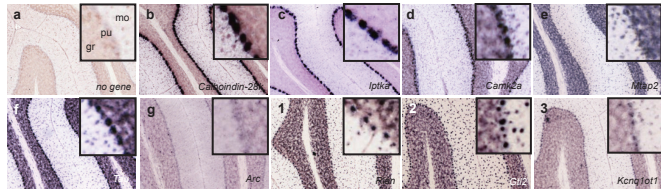

nuclear:

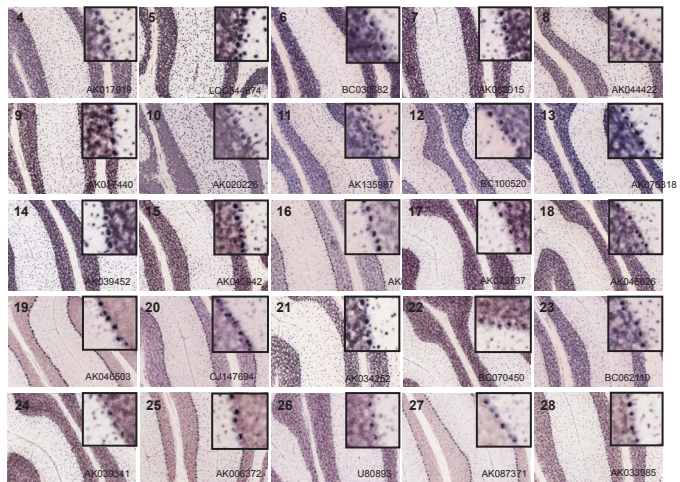

distinct foci:

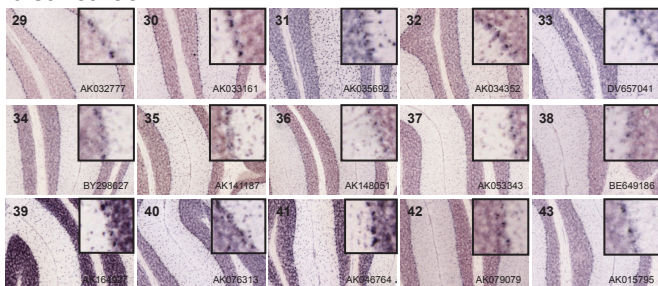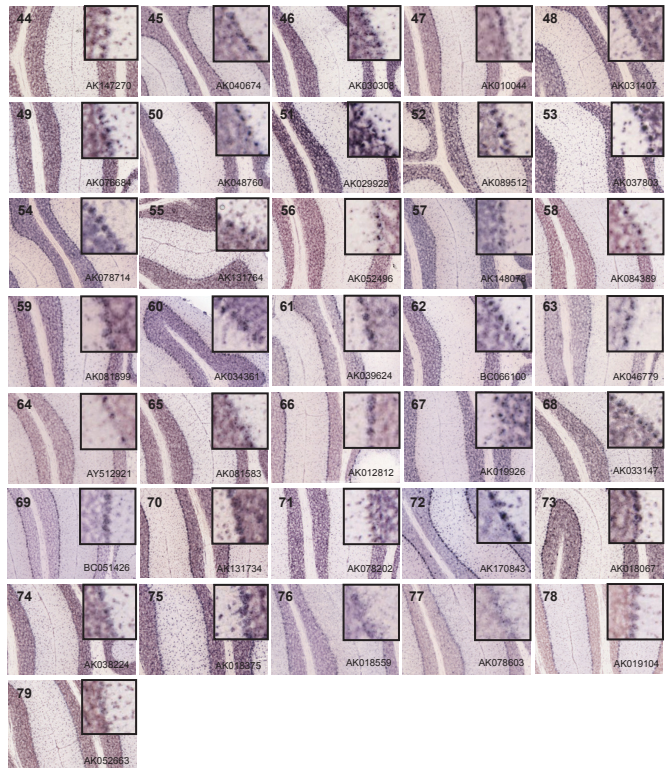

diffuse:

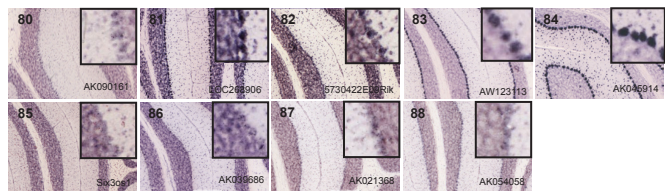

Supplement: pnas_0706729105_14.pdf [file pnas_0706729105_14.pdf]

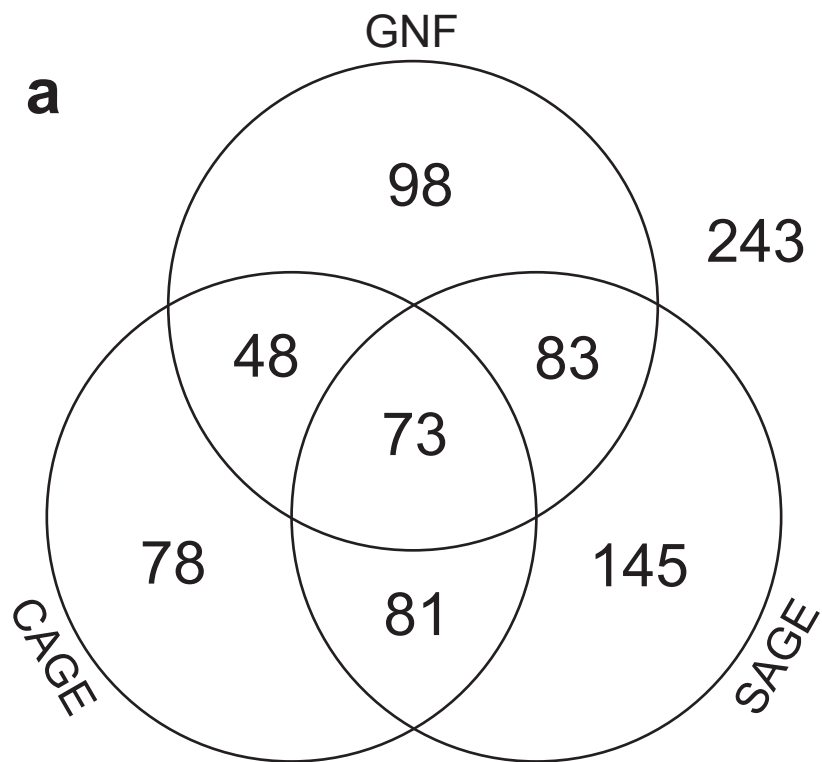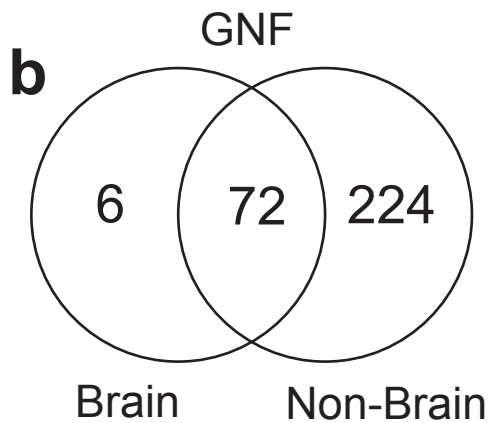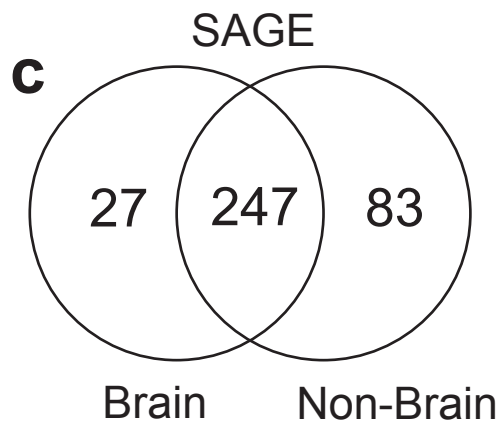

Supplement: pnas_0706729105_2.pdf [file pnas_0706729105_2.pdf]

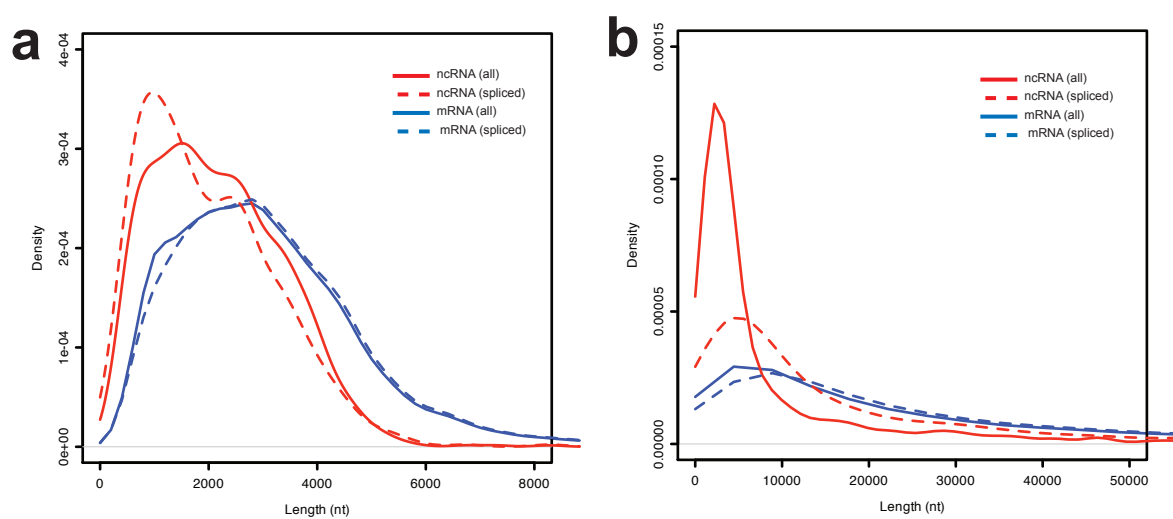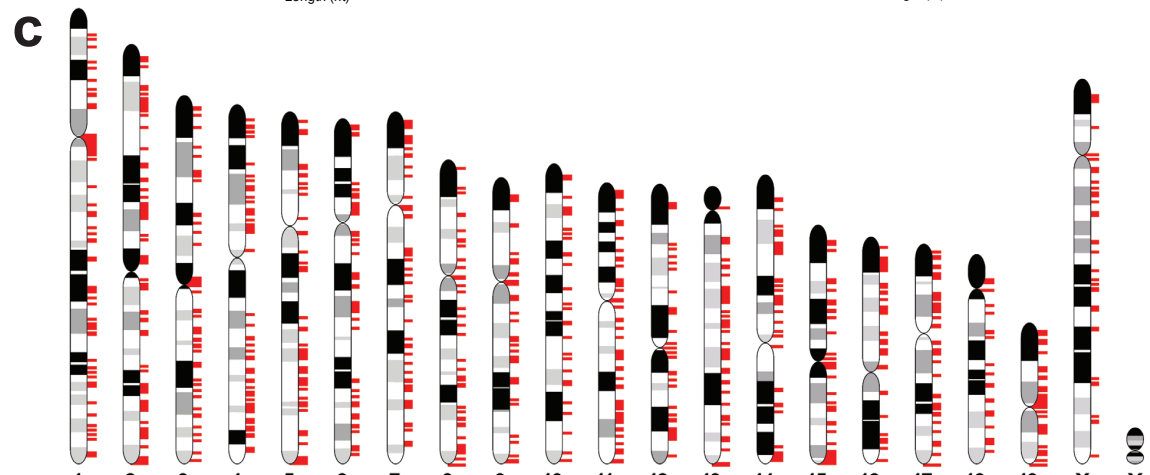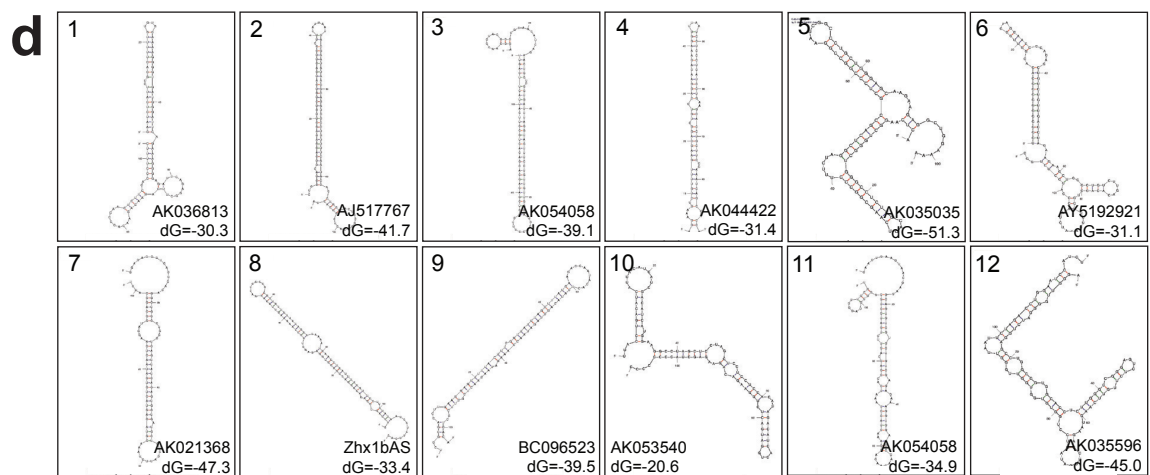

Supplement: pnas_0706729105_3.pdf [file pnas_0706729105_3.pdf]

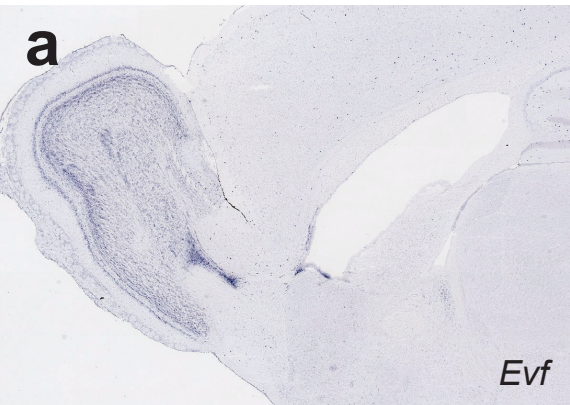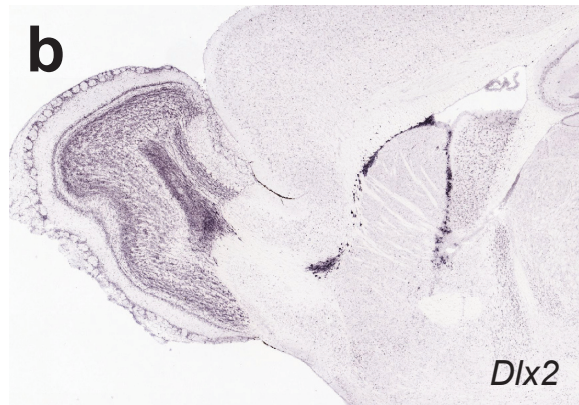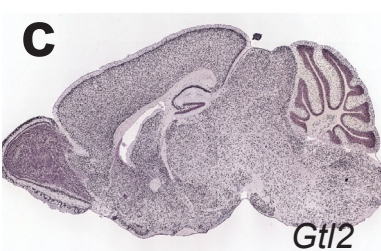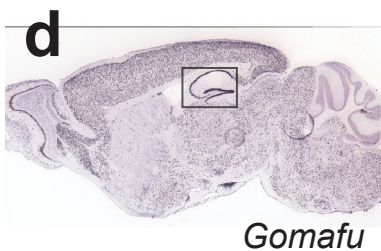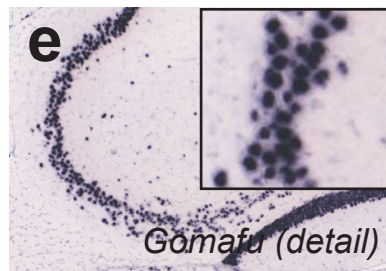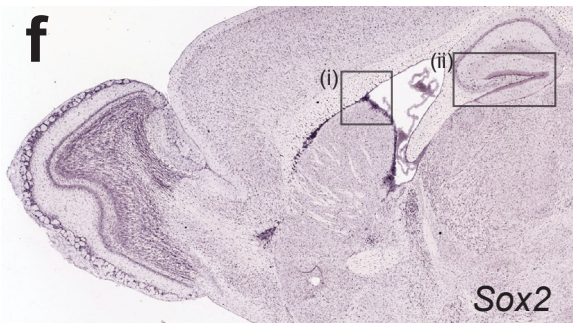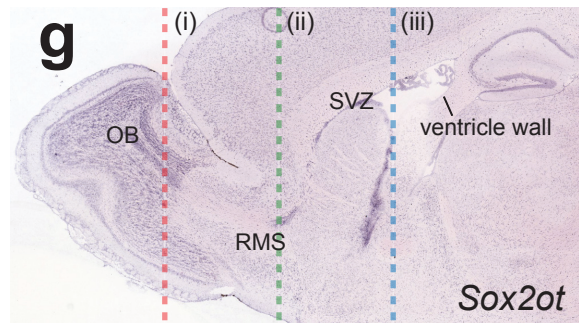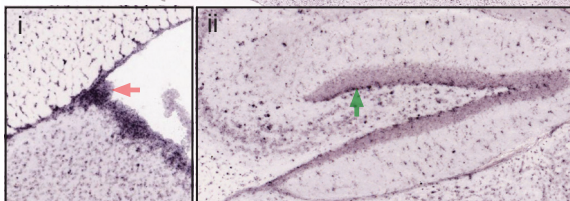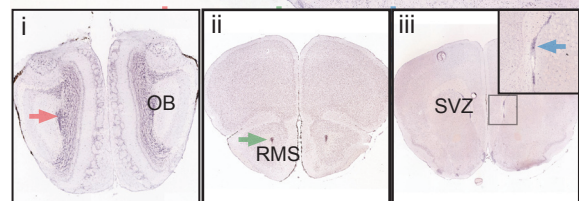

Supplement: pnas_0706729105_4.pdf [file pnas_0706729105_4.pdf]

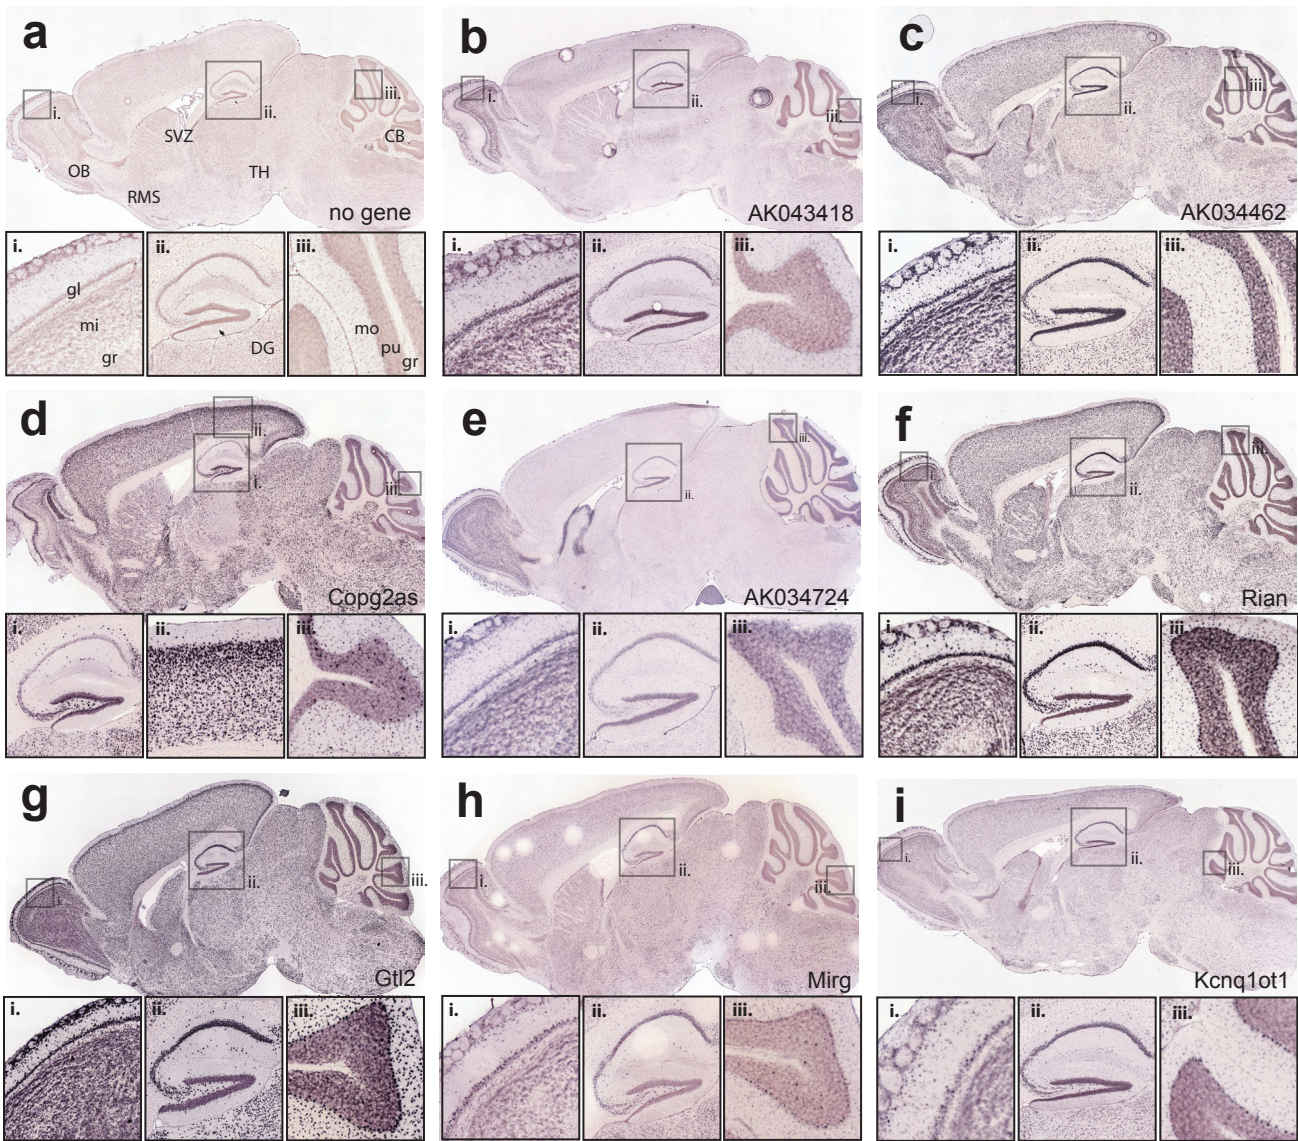

Supplement: pnas_0706729105_5.pdf [file pnas_0706729105_5.pdf]

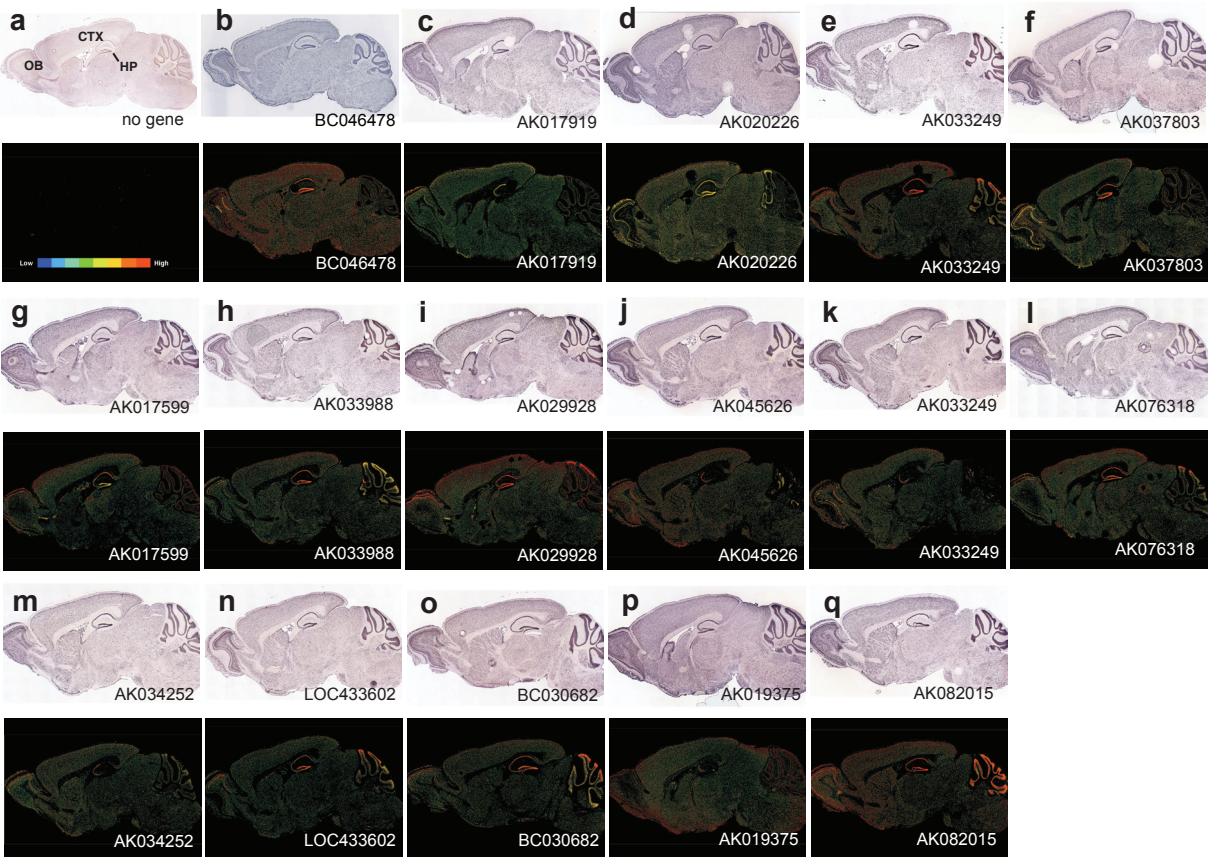

Supplement: pnas_0706729105_6.pdf [file pnas_0706729105_6.pdf]

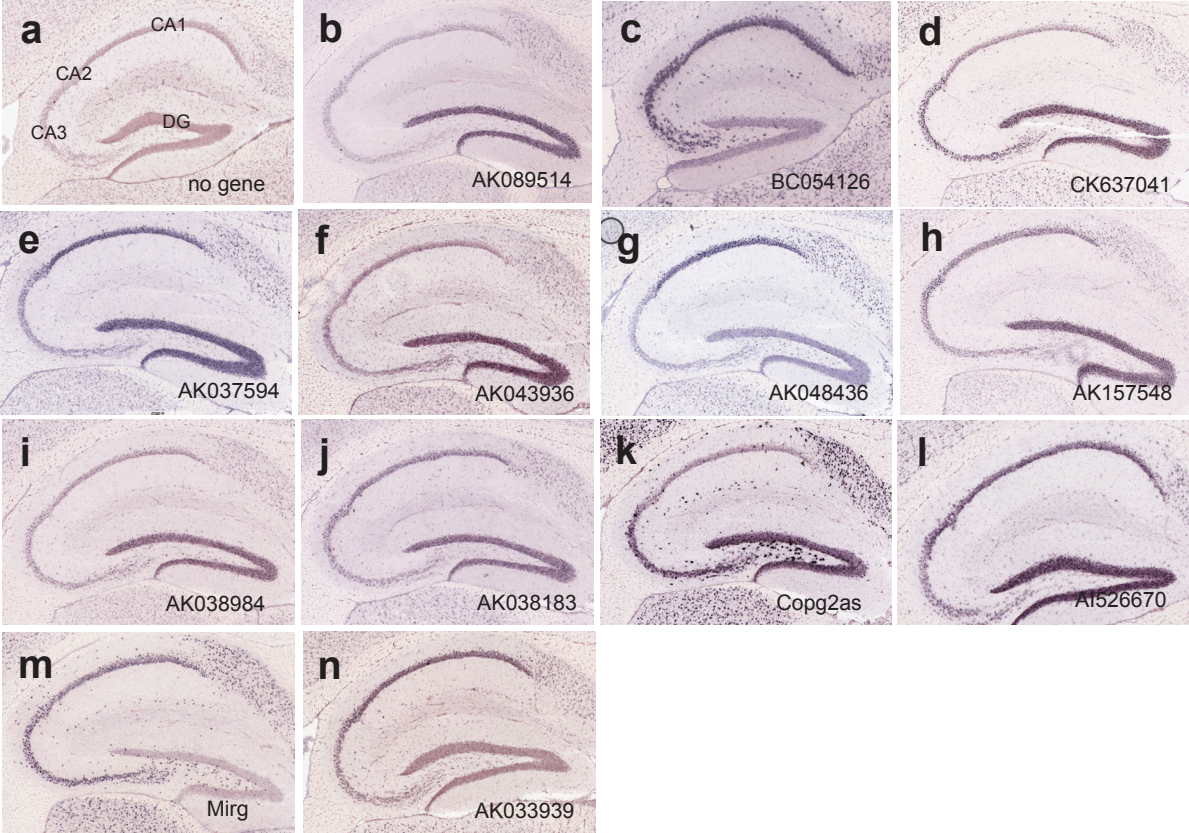

Supplement: pnas_0706729105_7.pdf [file pnas_0706729105_7.pdf]

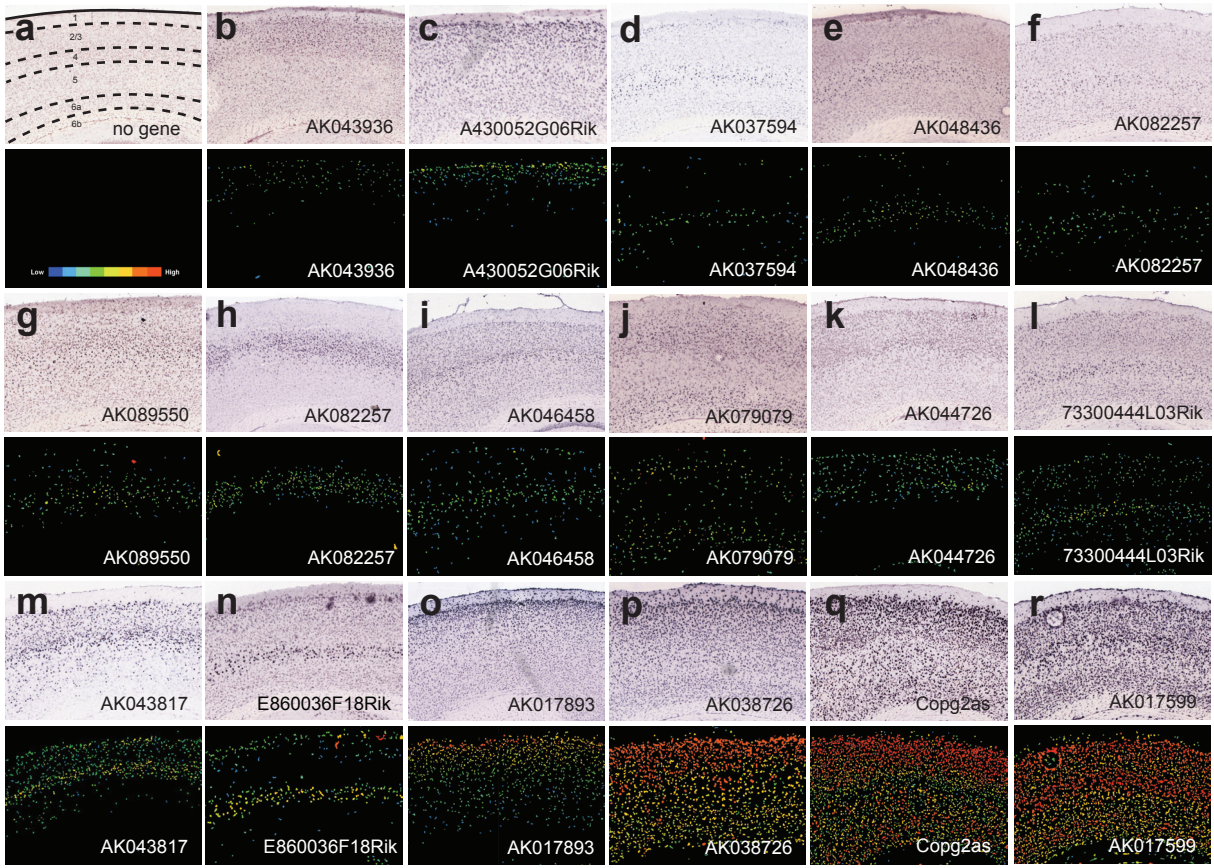

Supplement: pnas_0706729105_8.pdf [file pnas_0706729105_8.pdf]

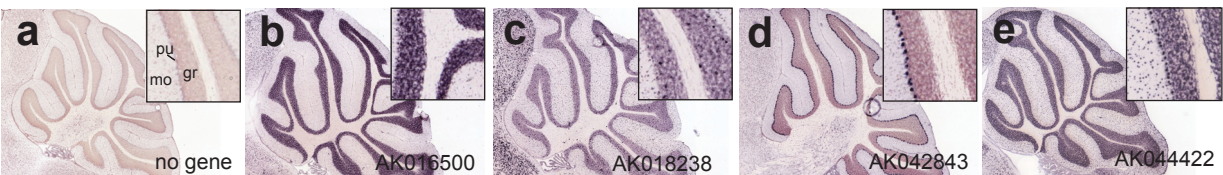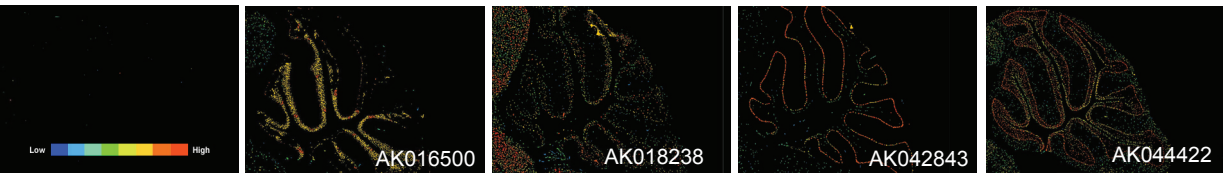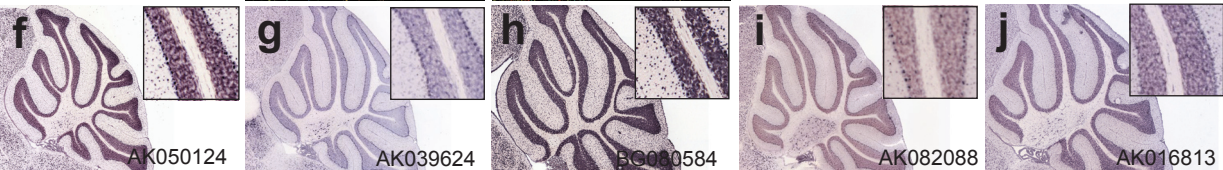

Supplement: pnas_0706729105_9.pdf [file pnas_0706729105_9.pdf]
